# Supplementary material for: Non-toxic polymer nanovectors for improved delivery of dexamethasone
Source: PubMed Central journal article supplement (PMC8390661; doi:10.1038/s41598-021-96797-4), 2021-08-26
Supplement: 41598_2021_96797_MOESM1_ESM.pdf [file 41598_2021_96797_MOESM1_ESM.pdf]

**Supplemental Data**

Non-toxic polymer nanovectors for improved delivery of dexamethasone

Benjamin C. Ede, Paraskevi Diamanti, David S. Williams and Allison Blair

**Supplemental Table 1 Patient characteristics**

| Patient ID | Karyotype | Age at diagnosis (y) | Gender | MRD risk status |
|------------|-----------|----------------------|--------|-----------------|
| 1          | t(11;14)  | 2                    | M      | Low             |
| 2          | t(1;14)   | 3                    | M      | Low             |
| 3          | ABL1      | 10                   | M      | Low             |
| 4          | +9        | 6                    | M      | Low             |
| 5          | del 6     | 13                   | M      | Risk            |
| 6          | 14q11     | 21                   | M      | N/A             |

Low and risk MRD status was defined at day 29. N/A, not available.

**Supplemental Table 2 Percentage of viable T-ALL cells following treatment with free Dex or Dex-NV (Fig. 2A)**

| Patient ID       | 1        | 2         | 3        | 4        | 5        | 6        |
|------------------|----------|-----------|----------|----------|----------|----------|
| Untreated        | 66.1±2.1 | 24.7±10.2 | 12.8±0.5 | 49.0±1.9 | 40.9±3.1 | 20.8±2.7 |
|                  |          |           |          |          |          |          |
| Free Dex (0.1µM) | 1.9±0.8  | 4.0±1     | 6.5±0.9  | 47.0±2.7 | 9.5±2.4  | 6.4±0.5  |
| Free Dex (1µM)   | 1.8±1.1  | 1.7±0.8   | 6.3±1.4  | 39.1±1.1 | 7.8±1.7  | 4.4±0.6  |
| Free Dex (10µM)  | 0.9±0.1  | 1.6±0.2   | 6.6±1.8  | 36.9±0.6 | 7.4±1.3  | 4.1±0.8  |
| Free Dex (100µM) | 1.5±0.4  | 0.7±0.1   | 6.7±1.3  | 33.8±2.4 | 5.5±0.4  | 3.9±0.4  |
|                  |          |           |          |          |          |          |
| Dex-NV (0.1µM)   | 1.7±0.1  | 8.0±1.4   | 8.2±0.3  | 45.2±1.4 | 8.9±2.8  | 4.9±0.3  |
| Dex-NV (1µM)     | 1.1±0.1  | 1.9±0/1   | 7.8±0.8  | 39.1±1.1 | 7.1±0.4  | 3.8±0.5  |
| Dex-NV (10µM)    | 1.3±0.2  | 1.6±0.1   | 8.1±0.6  | 39.3±0.6 | 6.4±0.4  | 3.3±0.8  |
| Dex-NV (100µM)   | 1.3±0.4  | 0.5±0.1   | 8.5±0.2  | 32.1±0.5 | 4.3±0.4  | 2.2±0.2  |

Data represents mean±SD from at least 2 replicates for each dose.

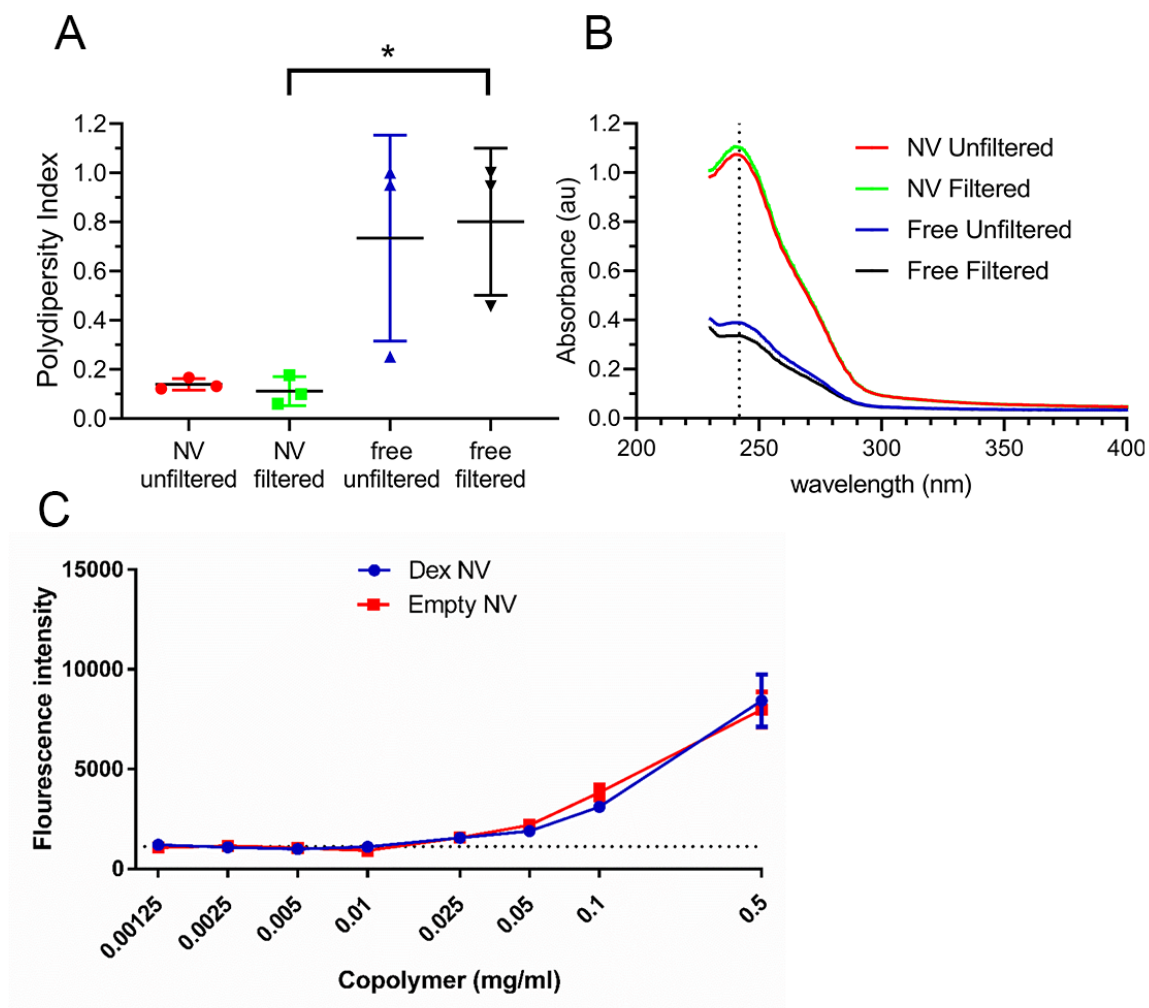

**Figure S1 Formation of Dex loaded PEG-PTMC NV**

A) Polydispersity index (PDI) values of Dex-NV formulations and free Dex from DLS pre and post filtration (200nM). B) Spectral scan of Dex-NV formulations and free drug, the dotted line indicates the expected wavelength of Dex absorbance (242nm) in solution. C) Critical micelle concentration determination of Dex-NV (blue) or empty NV (red) using 10 $\mu$ M DiO over different concentrations of copolymer (0.00125-0.5 mg/mL) in PBS. PDI data represented as mean $\pm$ SD (n=3). Fluorescence intensity data represented as mean $\pm$ SD (n=3). \* $P < 0.05$ .

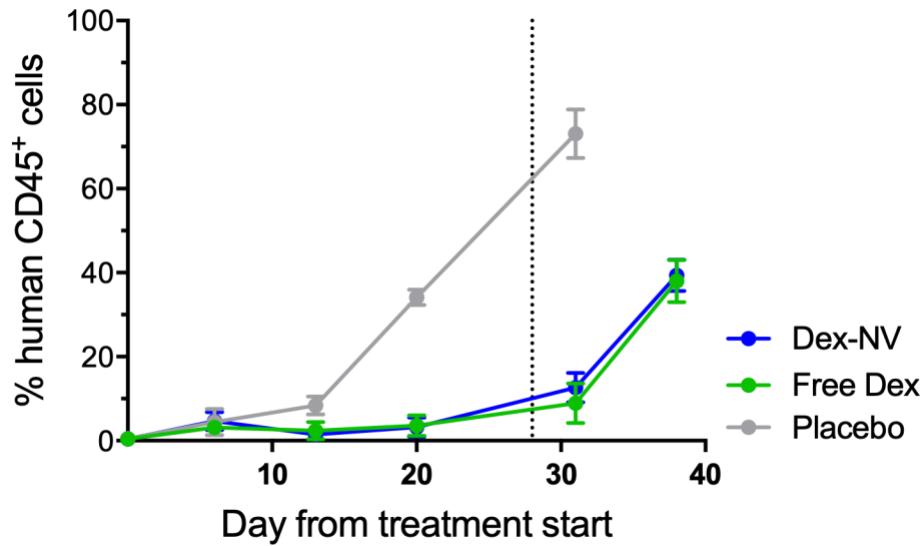

**Figure S2 Dex-NV IV treatment efficacy**

Cells from pt.1 were inoculated into NSG mice. Human cell (CD45<sup>+</sup> and CD7<sup>+</sup>) levels were measured in peripheral blood (PB) weekly. Once engraftment reached >0.1%, mice were treated IV with Dex-NV (Blue), free Dex (Green) both at 5mg/kg or placebo (Grey) 3 times per week over a 4-week period. Lines represent proportion of human cells detected in PB aspirates from individual mice (n=3 per treatment arm). Vertical dotted line indicates end of treatment.

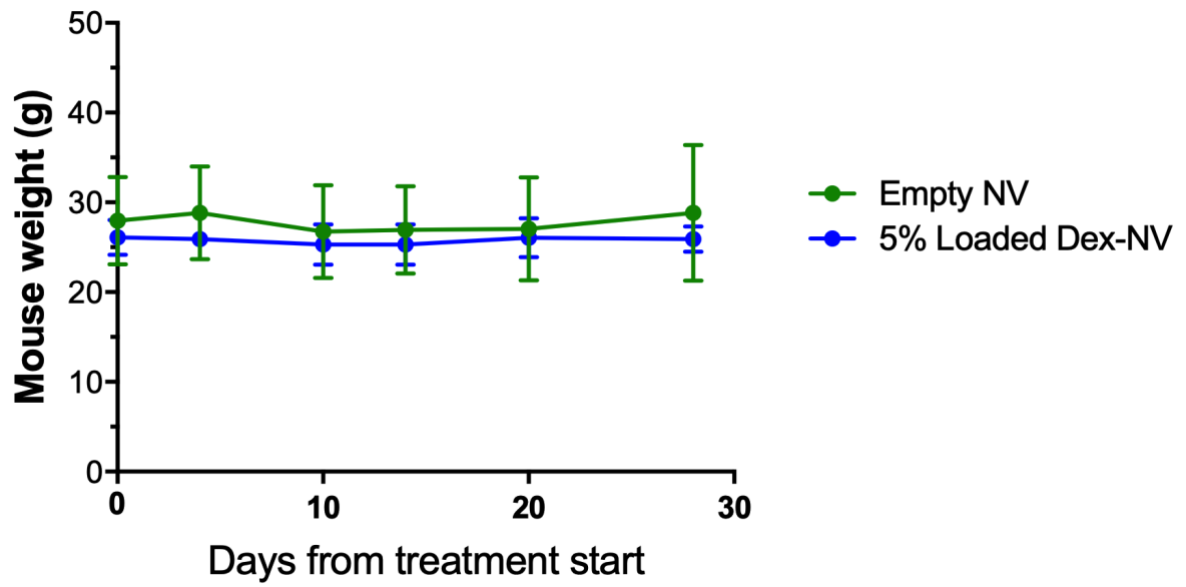

**Figure S3 Effect of empty and Dex-loaded NV on NSG body weight**

NSG mice were treated ip with empty NV or 5% loaded Dex-NV daily for 5 days over a 4-week period. Lines represent mean body weights of up to 3 mice, error bars represent SD.

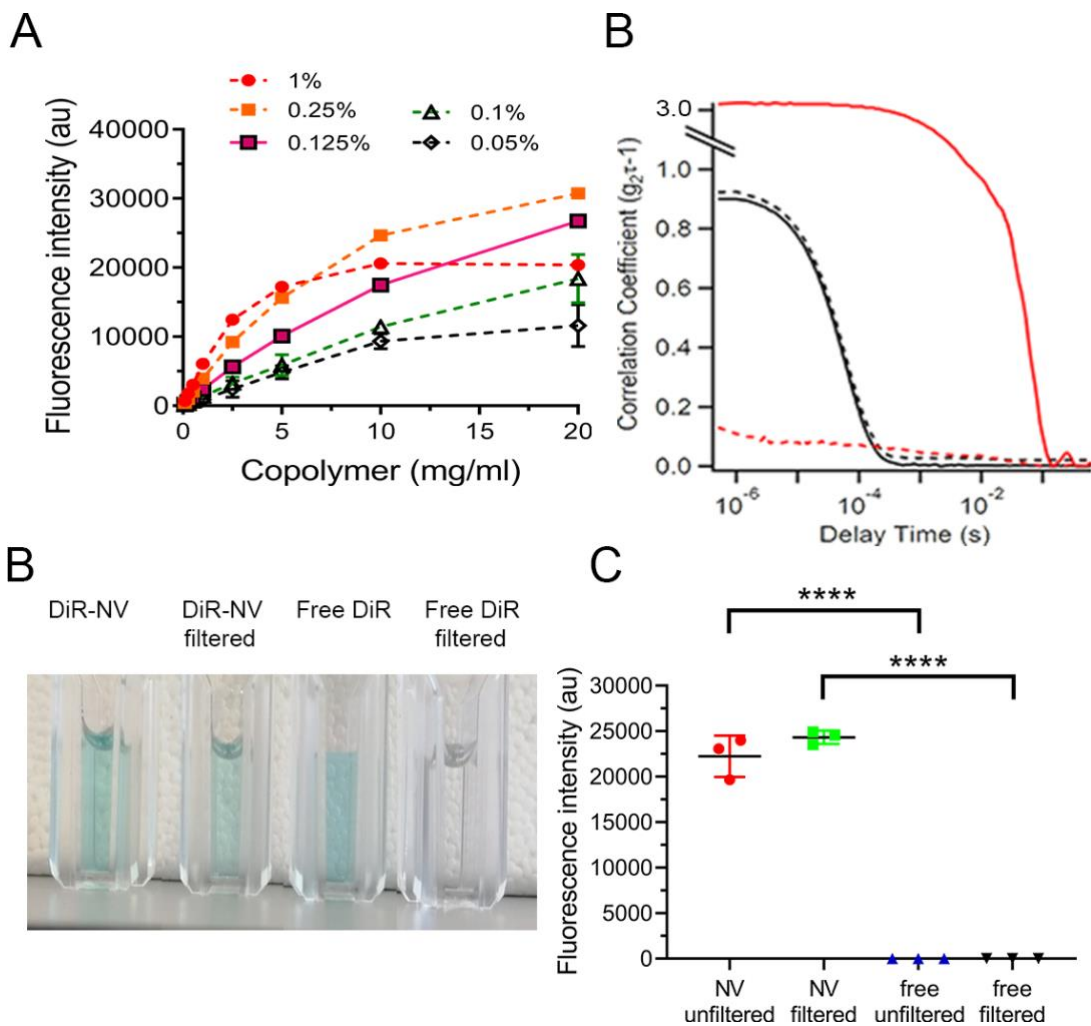

**Figure S4 Formation of DiR loaded PEG-PTMC NV**

A) Fluorescence intensity of different wt% loadings of DiR in NV at different concentrations of copolymer (0.1-20 mg/mL) in PBS. Solid line indicates the most linear increase in fluorescence intensity (0.125 wt% loading DiR). B) DLS correlogram data of NV (black) or free DiR (red), before (solid) and after (dashed lines) filtration. Fluorescence intensity data represented as mean $\pm$ SD (n=3). C) Macroscopic images of DiR-NV and free DiR, pre and post filtration (0.2 $\mu$ m). D) Fluorescence intensity of 0.125 wt% DiR-NV and free DiR pre and post filtration. Fluorescence intensity data represents mean $\pm$ SD. \*\*\*\* $P < 0.001$ . DiR, 1,1'-Dioctadecyl 3,3,3',3'-Tetramethylindotricarbocyanine Iodide; DLS, dynamic light scattering; PBS, phosphate buffered saline.

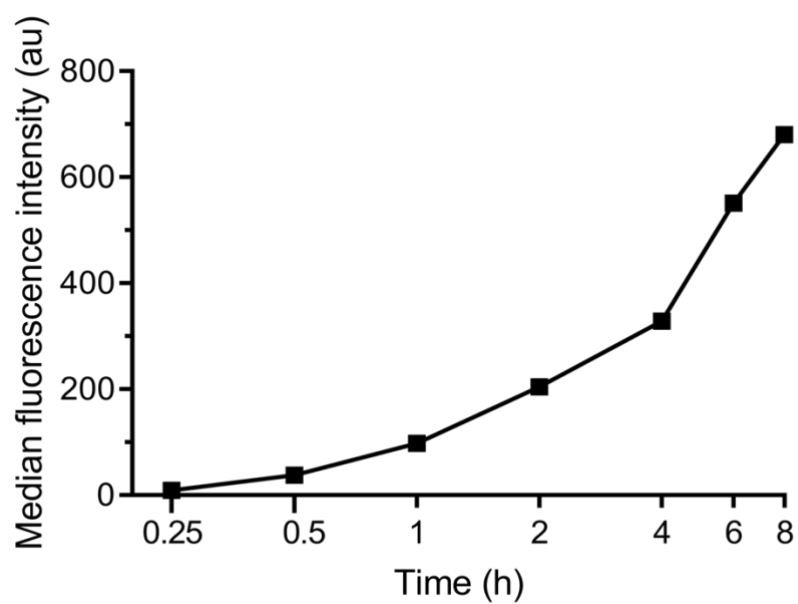

**Figure S5 Accumulation of DiR-NV in ALL cells**

Median fluorescence intensity of T-ALL cells from pt.1 treated with 0.125 wt% DiR-NV for 8 hours. Fluorescence intensity was determined by flow cytometry in viable (propidium iodide negative) cells.

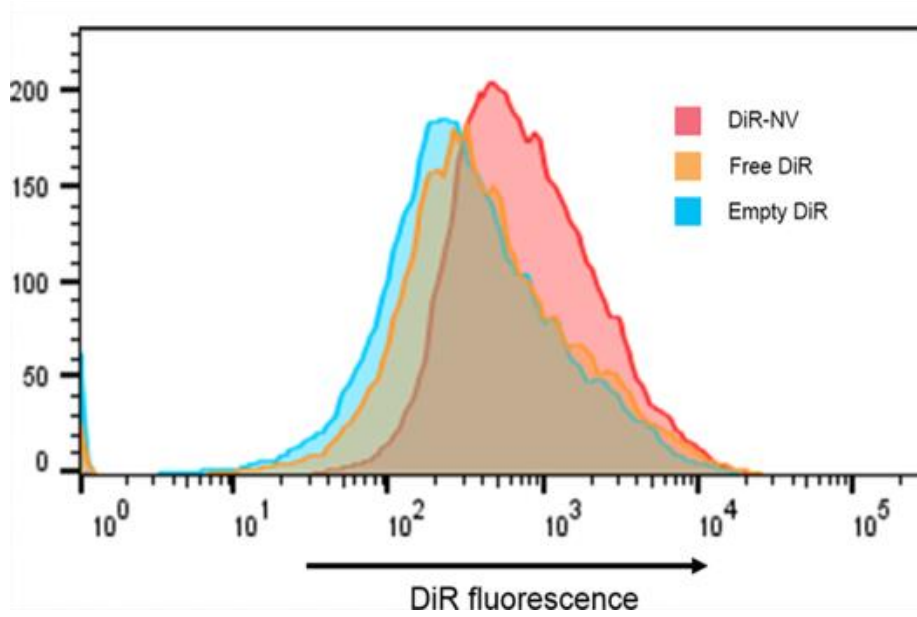

**Figure S6 Accumulation of DiR-NV in NSG BM cells**

Histograms representing the fluorescence intensity of DiR in mononuclear BM cells derived from NSG mice 24 hours after IV administration of DiR-NV (red), free DiR (orange) or empty NV (blue). Fluorescence intensity was determined by flow cytometry.
